# Supplementary material for: Conflicts of interest and spin in reviews of psychological therapies: a systematic review
Source: PubMed Central journal article supplement — BMJ Open. 2016 Apr 26;6(4):e010606. doi: 10.1136/bmjopen-2015-010606 (PMC4853969; doi:10.1136/bmjopen-2015-010606), 2016-04-26
Supplement: bmjopen-2015-010606supp.pdf [file bmjopen-2015-010606supp.pdf]

## Supplements

### Conflicts of interest and bias in systematic reviews of psychological therapies

Revision to BMJ Open

Klaus Lieb, Jan von der Osten-Sacken, Jutta Stoffers-Winterling, Neele Reiss,  
Jürgen Barth

Supplement Table 1: MEDLINE EBSCO exact search strategy (last run on February 3<sup>rd</sup>, 2014)

|    |                                                                                               |
|----|-----------------------------------------------------------------------------------------------|
| #  |                                                                                               |
| S1 | (MH "Psychotherapy+")                                                                         |
| S2 | (MH "Anxiety Disorders+")*                                                                    |
| S3 | (S1 AND S2)                                                                                   |
| S4 | (S1 AND S2) – Date of publication: 20100101-20131231; Publication Type: Meta-Analysis, Review |

\* This search is exemplary for anxiety disorders. Separate searches were done for depressive and personality disorders, using controlled vocabulary (MH "Depressive Disorders+") or (MH "Personality Disorders+"), resp.

Supplement Table 2: PsycINFO EBSCO exact search strategy (last run on February 3<sup>rd</sup>, 2014)

| #  |                                                                                                                                                                                                                                                                                                                                                                                                                                                                                                                                                                                                                                                                                                                                                                                                                                                                                                                                                                                                                                                                                                                                                                                                                                                                                                                                                 |
|----|-------------------------------------------------------------------------------------------------------------------------------------------------------------------------------------------------------------------------------------------------------------------------------------------------------------------------------------------------------------------------------------------------------------------------------------------------------------------------------------------------------------------------------------------------------------------------------------------------------------------------------------------------------------------------------------------------------------------------------------------------------------------------------------------------------------------------------------------------------------------------------------------------------------------------------------------------------------------------------------------------------------------------------------------------------------------------------------------------------------------------------------------------------------------------------------------------------------------------------------------------------------------------------------------------------------------------------------------------|
| S1 | DE "Psychotherapy" OR DE "Adlerian Psychotherapy" OR DE "Adolescent Psychotherapy" OR DE "Analytical Psychotherapy" OR DE "Autogenic Training" OR DE "Behavior Therapy" OR DE "Brief Psychotherapy" OR DE "Brief Relational Therapy" OR DE "Child Psychotherapy" OR DE "Client Centered Therapy" OR DE "Cognitive Behavior Therapy" OR DE "Conversion Therapy" OR DE "Eclectic Psychotherapy" OR DE "Emotion Focused Therapy" OR DE "Existential Therapy" OR DE "Experiential Psychotherapy" OR DE "Expressive Psychotherapy" OR DE "Eye Movement Desensitization Therapy" OR DE "Feminist Therapy" OR DE "Geriatric Psychotherapy" OR DE "Gestalt Therapy" OR DE "Group Psychotherapy" OR DE "Guided Imagery" OR DE "Humanistic Psychotherapy" OR DE "Hypnotherapy" OR DE "Individual Psychotherapy" OR DE "Insight Therapy" OR DE "Integrative Psychotherapy" OR DE "Interpersonal Psychotherapy" OR DE "Logotherapy" OR DE "Narrative Therapy" OR DE "Network Therapy" OR DE "Persuasion Therapy" OR DE "Primal Therapy" OR DE "Psychoanalysis" OR DE "Psychodrama" OR DE "Psychodynamic Psychotherapy" OR DE "Psychotherapeutic Counseling" OR DE "Rational Emotive Behavior Therapy" OR DE "Reality Therapy" OR DE "Relationship Therapy" OR DE "Solution Focused Therapy" OR DE "Supportive Psychotherapy" OR DE "Transactional Analysis" |
| S2 | DE "Anxiety Disorders" OR DE "Acute Stress Disorder" OR DE "Castration Anxiety" OR DE "Death Anxiety" OR DE "Generalized Anxiety Disorder" OR DE "Obsessive Compulsive Disorder" OR DE "Panic Disorder" OR DE "Phobias" OR DE "Posttraumatic Stress Disorder" OR DE "Separation Anxiety"                                                                                                                                                                                                                                                                                                                                                                                                                                                                                                                                                                                                                                                                                                                                                                                                                                                                                                                                                                                                                                                        |
| S3 | (S1 AND S2)                                                                                                                                                                                                                                                                                                                                                                                                                                                                                                                                                                                                                                                                                                                                                                                                                                                                                                                                                                                                                                                                                                                                                                                                                                                                                                                                     |
| S4 | (S1 AND S2) – Published date: 20100101-20131231; Methodology: -Systematic Review, -Meta Analysis                                                                                                                                                                                                                                                                                                                                                                                                                                                                                                                                                                                                                                                                                                                                                                                                                                                                                                                                                                                                                                                                                                                                                                                                                                                |

\* This search is exemplary for anxiety disorders. Separate searches were done for depressive and personality disorders, using controlled vocabulary (DE "Major Depression" OR DE "Anaclitic Depression" OR DE "Dysthymic Disorder" OR DE "Endogenous Depression" OR DE "Postpartum Depression" OR DE "Reactive Depression" OR DE "Recurrent Depression" OR DE "Treatment Resistant Depression") or (DE "Personality Disorders" OR DE "Antisocial Personality Disorder" OR DE "Avoidant Personality Disorder" OR DE "Borderline Personality Disorder" OR DE "Dependent Personality Disorder" OR DE "Histrionic Personality Disorder" OR DE "Narcissistic Personality Disorder" OR DE "Obsessive Compulsive Personality Disorder" OR DE "Paranoid Personality Disorder" OR DE "Passive Aggressive Personality Disorder" OR DE "Sadomasochistic Personality" OR DE "Schizoid Personality Disorder" OR DE "Schizotypal Personality Disorder"), resp.

### Supplement Table 3: References of the 95 reviews included in this study

Abbass A, Town J, Driessen E. Intensive short-term dynamic psychotherapy: A systematic review and meta-analysis of outcome research. *Harv Rev Psychiatry* 2012;20(2):97-108.

Abbass A, Town J, Driessen E. The efficacy of short-term psychodynamic psychotherapy for depressive disorders with comorbid personality disorder. *Psychiatry* 2011;74(1):58-71.

Baardseth TP, Goldberg SB, Pace BT, et al. Cognitive-behavioral therapy versus other therapies: Redux. *Clin Psychol Rev* 2013;33(3):395-405.

Barker-Collo S, Starkey N, Theadom A. Treatment for depression following mild traumatic brain injury in adults: A meta-analysis. *Brain Inj* 2013;27(10):1124-1133.

Bartley CA, Hay M, Bloch MH. Meta-analysis: Aerobic exercise for the treatment of anxiety disorders. *Prog Neuropsychopharmacol Biol Psychiatry* 2013;45:34-39.

Barrera TL, Mott JM, Hofstein RF, et al. A meta-analytic review of exposure in group cognitive behavioral therapy for posttraumatic stress disorder. *Clin Psychol Rev* 2013;33(1):24-32.

Beltman MW, Oude Voshaar RC, Speckens AE. Cognitive-behavioural therapy for depression in people with a somatic disease: meta-analysis of randomized controlled trials. *Br J Psychiatry* 2010;197(1):11-19.

Bomyea J, Lang AJ. Emerging interventions for PTSD: Future directions for clinical care and research *Neuropharmacology* 2012;62:607-616.

Bontempo A, Panza KE, Bloch MH. Meta-Analysis: D-cycloserine Augmentation of Behavioral Therapy for the Treatment of Anxiety Disorders. *J Clin Psychiatry* 2012;73(4):533–537.

Budge SL, Moore JT, Del Re AC, et al. The effectiveness of evidence-based treatments for personality disorders when comparing treatment-as-usual and bona fide treatments. *Clin Psychol Rev* 2013;33:1057–1066.

Busch FN, Sandberg LS. Combined treatment of depression *Psychiatr Clin North Am* 2012;35:165-179.

Casement MD, Swanson LM. A meta-analysis of imagery rehearsal for post-trauma nightmares: Effects on nightmare frequency, sleep quality, and posttraumatic stress. *Clin Psychol Rev* 2012;32:566–574.

Chard KM, Ricksecker EG, Healy ET, et al. Dissemination and experience with cognitive processing therapy. *J Rehabil Res Dev* 2012;49(5):667-78.

Chen KW, Berger CC, Manheimer E, et al. Meditative therapies for reducing anxiety: A systematic review and meta-analysis of randomized controlled trials. *DePress Anxiety* 2012;29:545–562.

Chugh-Gupta N, Baldassarre FG, Vrkljan BH. A systematic review of yoga for state anxiety: Considerations for occupational therapy. *Can J Occup Ther* 2013;80(3):150-170.

Cody RA, Drysdale K. The Effects of Psychotherapy on Reducing Depression in Residential Aged Care: A Meta-Analytic Review. *Clin Gerontol* 2013;36(1):46-69.

Cuijpers P, Andersson G, Donker T, et al. Psychological treatment of depression: Results of a series of meta-analyses *Nord J Psychiatry* 2011;65(6):354-364.

Cuijpers P, Berking M, Andersson G, et al. A Meta-Analysis of Cognitive-Behavioral Therapy for Adult Depression, Alone and in Comparison With Other Treatments. *Can J Psychiatry* 2013;58(7):376-385.

- Cuijpers P, Clignet F, van Meijel B, et al. Psychological treatment of depression in inpatients: a systematic review and meta-analysis. *Clin Psychol Rev* 2011;31(3):353-360.
- Cuijpers P, de Beurs DP, van Spijker BA, et al. The effects of psychotherapy for adult depression on suicidality and hopelessness: A systematic review and meta-analysis. *J Affect Disord* 2013;144(3):183-190.
- Cuijpers P, Driessen E, Hollon SD, et al. The efficacy of non-directive supportive therapy for adult depression: A meta-analysis. *Clin Psychol Rev* 2012;32:280–291.
- Cuijpers P, Geraedts AS, van Oppen P, et al. Interpersonal Psychotherapy for Depression: A Meta-Analysis. *Am J Psychiatry* 2011;168:581–592.
- Cuijpers P, Huibers M, Ebert DD, et al. How much psychotherapy is needed to treat depression? A metaregression analysis. *J Affect Disord* 2013;149(1-3):1-13.
- Cuijpers P, Reynolds III CF, Donker T, et al. Personalized treatment of adult depression: Medication, psychotherapy, or both? A systematic review. *Depress Anxiety* 2012;29:855–864.
- Cuijpers P, van Straten A, Hollon SD, et al. The contribution of active medication to combined treatments of psychotherapy and pharmacotherapy for adult depression: a meta-analysis *Acta Psychiatr Scand* 2010;121:415–423.
- Cuijpers P, van Straten A, Schuurman J, et al. Psychotherapy for chronic major depression and dysthymia: A meta-analysis *Clin Psychol Rev* 2010;30:51–62.
- Daigle MS, Pouliot L, Chagnon F, et al. Suicide attempts: Prevention of repetition. *Can J Psychiatry* 2011;56(10):621-629.
- Dickens C, Cherrington A, Adeyemi I, et al. Characteristics of Psychological Interventions That Improve Depression in People With Coronary Heart Disease: A Systematic Review and Meta-Regression. *Psychosom Med* 2013;75:211-221.
- Dossa NI, Hatem M. Cognitive-Behavioral Therapy versus Other PTSD Psychotherapies as Treatment for Women Victims of War-Related Violence: A Systematic Review. *Scientific World Journal* 2012;2012:181847. doi:10.1100/2012/181847. Epub 2012 Apr 19.
- Driessen E, Cuijpers P, de Maat SCM, et al. The efficacy of short-term psychodynamic psychotherapy depression: a meta-analysis. *Clin Psychol Rev* 2010;30(1):25-36.
- Ekers D, Webster LAD. An overview of the effectiveness of psychological therapy for depression and stepped care service delivery models. *J Res Nurs* 2013;18(2):171-184,
- Faller H, Schuler M, Richard M, et al. Effects of psycho-oncologic interventions on emotional distress and quality of life in adult patients with cancer: systematic review and meta-analysis. *J Clin Oncol* 2013;31(6):782-93.
- Feng CY, Chu H, Chen CH, et al. The Effect of Cognitive Behavioral Group Therapy for Depression: A Meta-Analysis 2000–2010. *Worldviews Evid Based Nurs* 2012;9(1):2-17.
- Fritzsche A, Clamor A, von Leupoldt A. Effects of medical and psychological treatment of depression in patients with COPD e A review *Respir Med* 2011;105:1422-1433.
- Gibbon S, Duggan C, Stoffers J, et al. Psychological interventions for antisocial personality disorder. *Cochrane Database Syst Rev* 2010;6: CD007668. doi:10.1002/14651858.CD007668.pub2.
- Goncalves DC, Byrne GJ. Interventions for generalized anxiety disorder in older adults: Systematic review and meta-analysis *J Anxiety Disord* 2012;26:1–11.
- Goodson J, Helstrom A, Halpern JM, et al. Treatment of posttraumatic stress disorder in US combat veterans: a meta-analytic review. *Psychol Rep* 2011;109(2):573-599.

Gould RL, Coulson MC, Howard RJ. Efficacy of Cognitive Behavioral Therapy for Anxiety Disorders in Older People: A Meta-Analysis and Meta-Regression of Randomized Controlled Trials. *J Am Geriatr Soc* 2012;60(2):218-29. DOI: 10.1111/j.1532-5415.2011.03824.x JAGS 60:218–229, 2012.

Guidi J, Fava GA, Fava M, et al. Efficacy of the sequential integration of psychotherapy and pharmacotherapy in major depressive disorder: a preliminary meta-analysis. *Psychol Med* 2011;41:321–331.

Gwozdziwycz N, Mehl-Madrona L. Meta-analysis of the use of narrative exposure therapy for the effects of trauma among refugee populations. *Perm J* 2013;17(1):70-76.

Hanrahan F, Field AP, Jones FW, et al. A meta-analysis of cognitive therapy for worry in generalized anxiety disorder. *Clin Psychol Rev* 2013;33(1):120-32.

Hans E, Hiller W. Effectiveness of and Dropout From Outpatient Cognitive Behavioral Therapy for Adult Unipolar Depression: A Meta-Analysis of Nonrandomized Effectiveness Studies. *J Consult Clin Psychol* 2013;81(1):75•88.

Hansen K, Höfling V, Kröner-Borowik T, et al. Efficacy of psychological interventions aiming to reduce chronic nightmares: a meta-analysis. *Clin Psychol Rev* 2013;33(1):146-55.

Hart SL, Hoyt MA, Diefenbach M, et al. Meta-Analysis of Efficacy of Interventions for Elevated Depressive Symptoms in Adults Diagnosed With Cancer. *J Natl Cancer Inst* 2012;104:990–1004.

Haug T, Nordgreen T, Öst LG, et al. Self-help treatment of anxiety disorders: A meta-analysis and meta-regression of effects and potential moderators *Clin Psychol Rev* 2012;32:425–445.

Hetrick SE, Purcell R, Garner B, et al. Combined pharmacotherapy and psychological therapies for post traumatic stress disorder (PTSD) *Cochrane Database Syst Rev* 2010;7:CD007316. DOI:10.1002/14651858.CD007316.pub2.

Ho MSK, Lee CW. Cognitive behaviour therapy versus eye movement desensitization and reprocessing for post-traumatic disorder – is it all in the homework then? *Eur Rev Appl Psychol* 2012;62:253–260.

Hobbs JDJ, Kushner MG, Lee SS, et al. Meta-analysis of Supplemental Treatment for Depressive and Anxiety Disorders in Patients Being Treated for Alcohol Dependence. *Am J Addict* 2011;20:319–329.

Hofmann SG, Sawyer AT, Witt AA, et al. The effect of mindfulness-based therapy on anxiety and depression: A meta-analytic review. *J Consult Clin Psychol* 2010;78(2):169-183.

Huntley AL, Araya R, Salisbury C. Group psychological therapies for depression in the community: systematic review and meta-analysis. *Br J Psychiatry* 2012;200:184–190. doi: 10.1192/bjp.bp.111.092049

Imel ZE, Laska, K, Jakupcak M, et al. Meta-Analysis of Dropout in Treatments for Posttraumatic Stress Disorder. *J Consult Clin Psychol* 2013;81(3)394-404.

IsHak WW, Ha K, Kapitanski N, et al. The Impact of Psychotherapy, Pharmacotherapy, and Their Combination on Quality of Life in Depression. *Harv Rev Psychiatry* 2011;19:277–289.

Jakobsen JC, Hansen JL, Simonsen E, et al. The effect of adding psychodynamic therapy to antidepressants in patients with major depressive disorder. A systematic review of randomized clinical trials with meta-analyses and trial sequential analyses *J Affect Disord* 2012;137:4–14.

Jakobsen JC, Hansen JL, Simonsen S, et al. Effects of cognitive therapy versus interpersonal psychotherapy in patients with major depressive disorder: a systematic review of randomized clinical trials with meta-analyses and trial sequential analyses. *Psychol Med* 2012;42:1343–1357. doi:10.1017/S0033291711002236.

Krishna M, Honagodu A, Rajendra R, et al. A systematic review and meta-analysis of group psychotherapy for sub-clinical depression in older adults. *Int J of Geriatr Psychiatry* 2013;28(9):881-888.

Krishna M, Jauhari A, Lepping P, et al. Is group psychotherapy effective in older adults with depression? A systematic review. *Int J of Geriatr Psychiatry*. 2011;26(4):331-340.

Leisenring F, Rabung S. Long-term psychodynamic psychotherapy in complex mental disorders: update of a meta-analysis. *Br J Psychiatry* 2011;199(1):15-22.

Luciano M, Del Vecchio V, Giacco D, et al. A 'family affair'? The impact of family psychoeducational interventions on depression. *Expert Rev. Neurother* 2012;12(1):83-92.

Markowitz SM, Gonzalez JS, Wilkinson JL, et al. A Review of Treating Depression in Diabetes: Emerging Findings. *Psychosomatics* 2011;52:1-18.

Mavrides N, Nemeroff C. Treatment of depression in cardiovascular disease. *Depress Anxiety* 2013;30(4):328-41.

Nenova M, Morris L, Paul L, et al. Psychosocial Interventions With Cognitive-Behavioral Components for the Treatment of Cancer-Related Traumatic Stress Symptoms: A Review of Randomized Controlled Trials. *J Cogn Psychother* 2013;27(3):258-284.

Nickerson A, Bryant RA, Silove D, et al. A critical review of psychological treatments of posttraumatic stress disorder in refugees. *Clin Psychol Rev* 2011;31:399-417.

Oestergaard S, Møldrup C. Optimal duration of combined psychotherapy and pharmacotherapy for patients with moderate and severe depression: A meta-analysis. *J Affect Disord* 2011;131:24-36.

Olatunji BO, Davis ML, Powers MB, et al. Cognitive-behavioral therapy for obsessive-compulsive disorder: A meta-analysis of treatment outcome and moderators. *J Psychiatr Res* 2013;47(1):33-41.

Opris D, Pintea S, Garcia-Palacios A, et al. Virtual reality exposure therapy in anxiety disorders: A quantitative meta-analysis. *Depress Anxiety* 2012;29(2):85-93.

Palic S, Elklit A. Psychosocial treatment of post-traumatic stress disorder in adult refugees: a systematic review of prospective treatment outcome studies and a critique. *J Affect Disord* 2011;131(1-3):8-23.

Piet J, Hougaard E. The effect of mindfulness-based cognitive therapy for prevention of relapse in recurrent major depressive disorder: a systematic review and meta-analysis. *Clin Psychol Rev* 2011;31(6):1032-1040.

Possemato K. The current state of intervention research for posttraumatic stress disorder within the primary care setting. *J Clin Psychol Med Settings* 2011;18(3):268-280.

Powers MB, Halpern JM, Ferenschak MP, et al. A meta-analytic review of prolonged exposure for posttraumatic stress disorder. *Clin Psychol Rev* 2010;30(6):635-641.

Rakofsky JJ, Dunlop BW. Treating Nonspecific Anxiety and Anxiety Disorders in Patients With Bipolar Disorder: A Review. *J Clin Psychiatry* 2011;72(1):81-91.

Richards D, Richardson T. Computer-based psychological treatments for depression: A systematic review and meta-analysis. *Clin Psychol Rev* 2012;32:329-342.

Rizzo M, Creed F, Goldberg D, et al. A systematic review of non-pharmacological treatments for depression in people with chronic physical health problems. *J Psychosom Res* 2011;71(1):18-27.

Roberts NP, Kitchiner NJ, Kenardy J, et al. Early psychological interventions to treat acute traumatic stress symptoms. *Cochrane Database Syst Rev* 2010;3:CD007944. doi:10.1002/14651858.CD007944.pub2.

- Rosenberg Edwards A. Psychotherapy and Pharmacotherapy for Social Anxiety Disorder: A Comprehensive Meta-Analysis. *Dissertation abstracts international: Section B: the Sciences and Engineering* 2011;72(4-B):2433-2601.
- Roshanaei-Moghaddam B, Pauly MC, Atkins DC, et al. Relative effects of CBT and pharmacotherapy in depression versus anxiety: Is medication somewhat better for depression, and CBT somewhat better for anxiety? *Depress Anxiety* 2011;28:560–567.
- Samad Z, Brealey S, Gilbody S. The effectiveness of behavioural therapy for the treatment of depression in older adults: a meta-analysis. *Int J of Geriatr Psychiatry* 2011;26(12):1211-1220.
- Sanchez-Meca J, Rosa-Alcázar AI, Marín-Martínez F, et al. Psychological treatment of panic disorder with or without agoraphobia: a meta-analysis. *Clin Psychol Rev* 2010;30(1):37-50.
- Schoenfeld FB, DeViva JC, Manber R. Treatment of sleep disturbances in posttraumatic stress disorder: A review. *J Rehabil Res Dev* 2012;49(5):729–752.
- Sempértégui GA, Karreman A, Arntz A, et al. Schema therapy for borderline personality disorder: a comprehensive review of its empirical foundations, effectiveness and implementation possibilities. *Clin Psychol Rev* 2013;33(3):426-47.
- Sloan DM, Bovin MJ, Schnurr PP. Review of group treatment for PTSD. *J Rehabil Res Dev* 2012;49(5):689-701.
- Sloan DM, Feinstein BA, Gallagher MW, et al. Efficacy of Group Treatment for Posttraumatic Stress Disorder Symptoms: A Meta-Analysis. *Psychol Trauma* 2013;5(2):176-183.
- Sloan DM, Gallagher MW, Feinstein BA, et al. Efficacy of telehealth treatments for posttraumatic stress-related symptoms: a meta-analysis. *Cogn Behav Ther* 2011;40(2):111-125.
- Spielmans GI, Berman MI, Usitalo AN. Psychotherapy Versus Second-Generation Antidepressants in the Treatment of Depression A Meta-Analysis. *J Nerv Ment Dis* 2011;199:142–149.
- Spijker J, van Straten A, Bockting CL, et al. Psychotherapy, Antidepressants, and Their Combination for Chronic Major Depressive Disorder: A Systematic Review. *Can J Psychiatry* 2013;58(7):386-392.
- Stagg EK, Lazenby M. Best Practices for the Nonpharmacological Treatment of Depression at the End of Life. *Am J Hosp Palliat Care* 2012;29(3):183-194.
- Steenkamp MM, Litz BT Psychotherapy for military-related posttraumatic stress disorder: review of the evidence. *Clin Psychol Rev* 2013;33(1):45-53.
- Stoffers JM, Völlm BA, Rücker G, et al. Psychological therapies for people with borderline personality disorder (Review), *Cochrane Database Syst Rev* 2012;8:CD005652. doi:10.1002/14651858.CD005652.pub2.
- Van Dam D, Vedel E, Ehring T, et al. Psychological treatments for concurrent posttraumatic stress disorder and substance use disorder: A systematic review. *Clin Psychol Rev* 2012;32:202–214.
- Van der Feltz-Cornelis CM, Nuyen J, Stoop C, et al. Effect of interventions for major depressive disorder and significant depressive symptoms in patients with diabetes mellitus: a systematic review and meta-analysis *Gen Hosp Psychiatry* 2010;32:380–395.
- Van der Heiden C. Metacognitions in generalized anxiety disorder: theoretical and practical perspectives. *Expert Rev Neurother* 2013;13(2):135-141.
- Van Emmerik AA, Reijntjes A, Kamphuis JH. Writing Therapy for Posttraumatic Stress: A Meta-Analysis. *Psychother Psychosom* 2013;82:82-88.
- Van Hees ML, Rotter T, Ellermann T, et al. The effectiveness of individual interpersonal psychotherapy as a treatment for major depressive disorder in adult outpatients: A systematic review. *BMC Psychiatry* 2013;13:22. doi:10.1186/1471-244X-13-22.

Van Straten A, Geraedts A, Verdonck-de Leeuw IM, et al. Psychological treatment of depressive symptoms in patients with medical disorders: a meta-analysis. *J Psychosom Res* 2010;69(1):23-32.

Vøllestad J, Nielsen MB, Nielsen GH Mindfulness- and acceptance-based interventions for anxiety disorders: A systematic review and meta-analysis. *Br J Clin Psychol* 2012;51:239–260.

Watts BV, Schnurr PP, Mayo L, et al. Meta-Analysis of the Efficacy of Treatments for Posttraumatic Stress Disorder. *J Clin Psychiatry* 2013;74(6):541-550.



Supplement Table 4: Journals in which the 95 reviews were published

| <b>Journal</b>                                                                 | <b>2010</b> | <b>2011</b> | <b>2012</b> | <b>2013</b> | <b>Total number</b> |
|--------------------------------------------------------------------------------|-------------|-------------|-------------|-------------|---------------------|
| Clin Psychol Rev                                                               | 4           | 3           | 5           | 8           | 20                  |
| Depress Anxiety                                                                | -           | 1           | 3           | 1           | 5                   |
| J Affect Disord                                                                | -           | 2           | 1           | 2           | 5                   |
| Cochrane Database Syst Rev                                                     | 3           | -           | 1           | -           | 4                   |
| Br J Psychiatry                                                                | 1           | 1           | 1           | -           | 3                   |
| Can J Psychiatry                                                               | -           | 1           | -           | 2           | 3                   |
| Int J of Geriatr Psychiatry                                                    | -           | 2           | -           | 1           | 3                   |
| J Clin Psychiatry                                                              | -           | 1           | 1           | 1           | 3                   |
| Expert Rev Neurother                                                           | -           | -           | 1           | 1           | 2                   |
| Harv Rev Psychiatry                                                            | -           | 1           | 1           | -           | 2                   |
| J Consult Clin Psychol                                                         | 1           | -           | -           | 1           | 2                   |
| J Psychosom Res                                                                | 1           | 1           | -           | -           | 2                   |
| Psychol Med                                                                    | -           | 1           | 1           | -           | 2                   |
| Acta Psychiatr Scand                                                           | 1           | -           | -           | -           | 1                   |
| Am J Addict                                                                    | -           | 1           | -           | -           | 1                   |
| Am J Hosp Palliat Care                                                         | -           | -           | 1           | -           | 1                   |
| Am J Psychiatry                                                                | -           | 1           | -           | -           | 1                   |
| BMC Psychiatry                                                                 | -           | -           | -           | 1           | 1                   |
| Brain inj                                                                      | -           | -           | -           | 1           | 1                   |
| Br J Clin Psychol                                                              | -           | -           | 1           | -           | 1                   |
| Can J Occup Ther                                                               | -           | -           | -           | 1           | 1                   |
| Clin Gerontol                                                                  | -           | -           | -           | 1           | 1                   |
| Cogn Behav Ther                                                                | -           | 1           | -           | -           | 1                   |
| Dissertations Abstracts international: Section B: The Sciences and Engineering | -           | 1           | -           | -           | 1                   |
| Eur Rev Appl Psychol                                                           | -           | -           | 1           | -           | 1                   |
| Gen Hosp Psychiatry                                                            | 1           | -           | -           | -           | 1                   |
| J Am Geriatr Soc                                                               | -           | -           | 1           | -           | 1                   |
| J Anxiety Disord                                                               | -           | -           | 1           | -           | 1                   |

|                                           |   |   |   |   |   |
|-------------------------------------------|---|---|---|---|---|
| J Clin Oncol                              | - | - | - | 1 | 1 |
| J Clin Psychol Med Settings               | - | 1 | - | - | 1 |
| J Cogn Psychother                         | - | - | - | 1 | 1 |
| J Natl Cancer Inst                        | - | - | 1 | - | 1 |
| J Nerv Ment Dis                           | - | 1 | - | - | 1 |
| J Psychiatr Res                           | - | - | - | 1 | 1 |
| J Rehabil Res Dev                         | - | - | 1 | - | 1 |
| J Res Nurs                                | - | - | - | 1 | 1 |
| Neuropharmacology                         | - | - | 1 | - | 1 |
| Nord J Psychiatry                         | - | 1 | - | - | 1 |
| Perm J                                    | - | - | - | 1 | 1 |
| Prog Neuropsychopharmacol Biol Psychiatry | - | - | - | 1 | 1 |
| Psychiatr Clin North Am                   | - | - | 1 | - | 1 |
| Psychiatry                                | - | 1 | - | - | 1 |
| Psychol Rep                               | - | 1 | - | - | 1 |
| Psychol Trauma                            | - | - | - | 1 | 1 |
| Psychosom Med                             | - | - | - | 1 | 1 |
| Psychosomatics                            | - | 1 | - | - | 1 |
| Psychother Psychosom                      | - | - | - | 1 | 1 |
| Respir Med                                | - | 1 | - | - | 1 |
| Scientific World Journal                  | - | - | 1 | - | 1 |
| Worldviews Evid Based Nurs                | - | - | 1 | - | 1 |

Supplement Table 5: Mandatory disclosure of Conflicts of Interest by Journal – last accessed June 8, 2014

| <b>Journal</b>                                                                          | <b>Personal<br/>COI</b> | <b>Financial<br/>COI</b> | <b>Non-<br/>Financial<br/>COI</b> | <b>Inclusion of<br/>own<br/>primary<br/>study</b> | <b>Researcher<br/>allegiance</b> |
|-----------------------------------------------------------------------------------------|-------------------------|--------------------------|-----------------------------------|---------------------------------------------------|----------------------------------|
| Acta Psychiatr Scand                                                                    | no                      | Yes                      | No                                | No                                                | No                               |
| Am J Addict                                                                             | no                      | Yes                      | Yes                               | No                                                | No                               |
| Am J Hosp Palliat Care                                                                  | no                      | yes                      | No                                | No                                                | No                               |
| Am J Psychiatry                                                                         | no                      | yes                      | No                                | No                                                | No                               |
| BMC Psychiatry                                                                          | no                      | no                       | No                                | No                                                | No                               |
| Brain Inj                                                                               | yes                     | yes                      | No                                | No                                                | No                               |
| Br J Clin Psychol                                                                       | no                      | no                       | No                                | No                                                | No                               |
| Br J Psychiatry                                                                         | yes                     | yes                      | Yes                               | No                                                | No                               |
| Can J Occup Ther                                                                        | no                      | no                       | No                                | No                                                | No                               |
| Can J Psychiatry                                                                        | yes                     | yes                      | Yes                               | No                                                | No                               |
| Clin Gerontol                                                                           | no                      | no                       | No                                | No                                                | No                               |
| Clin Psychol Rev                                                                        | yes                     | yes                      | Yes                               | No                                                | No                               |
| Cochrane Database Syst<br>Rev                                                           | yes                     | yes                      | Yes                               | yes                                               | No                               |
| Cogn Behav Ther                                                                         | no                      | no                       | No                                | No                                                | No                               |
| Depress Anxiety                                                                         | yes                     | yes                      | No                                | No                                                | No                               |
| Dissertations Abstracts<br>international: Section B:<br>The Sciences and<br>Engineering | no                      | no                       | No                                | No                                                | No                               |
| Eur Rev Appl Psychol                                                                    | yes                     | yes                      | Yes                               | No                                                | No                               |
| Expert Rev Neurother                                                                    | yes                     | yes                      | Yes                               | No                                                | No                               |
| Gen Hosp Psychiatry                                                                     | yes                     | yes                      | Yes                               | No                                                | No                               |
| Harv Rev Psychiatry                                                                     | yes                     | yes                      | No                                | No                                                | No                               |
| Int J of Geriatr Psychiatry                                                             | yes                     | yes                      | No                                | No                                                | No                               |
| J Affect Disord                                                                         | yes                     | yes                      | Yes                               | No                                                | No                               |
| J Am Geriatr Soc                                                                        | yes                     | yes                      | Yes                               | No                                                | No                               |

|                                                 |         |         |         |         |         |
|-------------------------------------------------|---------|---------|---------|---------|---------|
| J Anxiety Disord                                | yes     | yes     | Yes     | No      | No      |
| J Clin Oncol                                    | yes     | yes     | No      | No      | No      |
| J Clin Psychiatry                               | yes     | yes     | No      | No      | No      |
| J Clin Psychol Med Settings                     | no      | yes     | No      | No      | No      |
| J Cogn Psychother                               | unclear | unclear | Unclear | Unclear | Unclear |
| J Consult Clin Psychol                          | yes     | yes     | No      | No      | No      |
| J Natl Cancer Inst                              | no      | yes     | No      | No      | No      |
| J Nerv Ment Dis                                 | yes     | yes     | Yes     | No      | No      |
| J Psychiatr Res                                 | yes     | yes     | No      | No      | yes     |
| J Psychosom Res                                 | yes     | yes     | Yes     | No      | No      |
| J Rehabil Res Dev                               | yes     | yes     | No      | No      | No      |
| J Res Nurs                                      | no      | yes     | No      | No      | No      |
| Neuropharmacology                               | yes     | yes     | Yes     | No      | No      |
| Nord J Psychiatry                               | no      | yes     | No      | No      | No      |
| Perm J                                          | yes     | yes     | No      | yes     | No      |
| Prog<br>Neuropsychopharmacol<br>Biol Psychiatry | yes     | yes     | Yes     | No      | No      |
| Psychiatr Clin North Am                         | no      | yes     | No      | No      | No      |
| Psychiatry                                      | no      | no      | No      | No      | No      |
| Psychol Med                                     | yes     | yes     | No      | No      | No      |
| Psychol Rep                                     | no      | no      | No      | No      | No      |
| Psychol Trauma                                  | yes     | yes     | Yes     | No      | yes     |
| Psychosom Med                                   | yes     | yes     | No      | No      | No      |
| Psychosomatics                                  | no      | yes     | No      | No      | No      |
| Psychother Psychosom                            | no      | yes     | No      | No      | No      |
| Respir Med                                      | yes     | yes     | Yes     | No      | No      |
| Scientific World Journal                        | no      | no      | No      | No      | No      |
| Worldviews Evid Based<br>Nurs                   | no      | yes     | No      | No      | No      |

Supplement Table 6: References of the own primary studies included into 34 reviews by the review authors

Abbass AA, Campbell S, Magee K, et al. Intensive short-term dynamic psychotherapy to reduce rates of emergency department return visits for patients with medically unexplained symptoms: preliminary evidence from a pre-post intervention study. *CJEM* 2009;11(6):529–534.

Abbass A. Intensive short-term dynamic psychotherapy in a private psychiatric office: Clinical and cost effectiveness. *Am J Psychother* 2002;56:225-232.

Abbass A. Intensive short-term dynamic psychotherapy of treatment-resistant depression: a pilot study. *Depress Anxiety* 2006;23:449–452.

Abbass A. Modified short-term dynamic psychotherapy in patients with bipolar disorder. Preliminary report of a case series. *Can Child Psychiatry Rev* 2002;11(1):19–22.

Abbass A. Office based research in intensive short-term dynamic psychotherapy (ISTDP): data from the first 6 years of practice. *Ad Hoc Bull Short Term Dyn Psychother* 2002;6(2):5–14.

Abbass A, Sheldon A, Gyra A, et al. Intensive short-term dynamic psychotherapy for DSM-IV personality disorders. *J Nerv Ment Dis* 2008;196:211–216.

Abbass A. Small-group videotape training for psychotherapy skill development. *Acad Psychiatry* 2004;28:151–155.

Andersson G, Waara J, Jonsson U, et al. Internet-based self-help versus one-session exposure in the treatment of spider phobia: a randomized controlled trial. *Cogn Behav Ther* 2009;38:114-120.

Araya R, Rojas G, Fritsch R, et al. Treating depression in primary care in low-income women in Santiago, Chile: a randomised controlled trial. *Lancet* 2003;361:995–1000.

Arntz A, Dietzel R, Dreessen L. Assumptions in borderline personality disorder, specificity, stability and relationship with etiological factors. *Behav Res Ther* 1999;37(6):545–557.

Arntz A, Dreessen L, Schouten E, et al. Beliefs in personality disorders: A test with the Personality Disorder Belief Questionnaire. *Behav Res Ther* 2004;42(10):1215–1225.

Arntz A, Klokman J, Sieswerda S. An experimental test of the schema mode model of borderline personality disorder. *J Behav Ther Exp Psychiatry* 2005;36(3):226–239.

Arntz A, Weertman A, Salet S. Interpretation bias in Cluster-C and borderline personality disorders. *Behav Res Ther* 2011;49(8):472–481.

Beck JG, Coffey SF, Foy DW, et al. Group cognitive behavior therapy for chronic posttraumatic stress disorder: An initial randomized pilot study. *Behav Ther* 2009;40:82–92.

Bisson JI, Shepherd JP, Joy D, et al. Early cognitive-behavioural therapy for post-traumatic stress symptoms after physical injury. *Br J Psychiatry* 2004;184:63-69.

Bormann JE, Thorp SR, Wetherell JL, et al. Meditation-Based Mantram Intervention for Veterans With Posttraumatic Stress Disorder: A Randomized Trial. *Psychol Trauma* 2012, March. Advance online publication. doi: 10.1037/a0027522.

Botella C, Garcia-Palacios A, Villa H, et al. Virtual reality exposure in the treatment of panic disorder and agoraphobia: a controlled study. *Clin Psychol Psychother* 2007;14:164–175.

Chard KM. An evaluation of cognitive processing therapy for the treatment of posttraumatic stress disorder related to childhood sexual abuse. *J Consult Clin Psychol* 2005;73(5):965–971.

Chard KM, Schumm JA, McIlvain SM, et al. Exploring the efficacy of a residential treatment for veterans with PTSD and traumatic brain injury. *J Trauma Stress* 2011;24(3):347–351.

Chard KM, Schumm JA, Owens GP, et al. A comparison of OEF and OIF veterans and Vietnam veterans receiving cognitive processing therapy. *J Trauma Stress* 2010;23(1):25–32.

De Jonghe F, Hendriksen M, van Aalst G, et al. Psychotherapy alone and combined with pharmacotherapy in the treatment of depression. *Br J Psychiatry* 2004;185:37-45.

Dickhaut V, Arntz A. Combined group and individual schema therapy for borderline personality disorder: A pilot study. *J Behav Ther Exp Psychiatr* 2014;45:242-251.

Dimidjian S, Hollon SD, Dobson KS, et al. Randomized trial of behavioral activation, cognitive therapy, and antidepressant medication in the acute treatment of adults with major depression. *J Consult Clin Psychol* 2006;74:658–670.

DuHamel KN, Mosher CE, Winkel G, et al. Randomized clinical trial of Telephone – administered cognitive-behavioral therapy to reduce posttraumatic stress disorder and distress symptoms after hematopoietic stem-cell transplantation. *J Clin Oncol* 2010;28(23):3754-3761.

Ekers D, Richards D, Gilbody S. A meta-analysis of behavioural therapy for depression. *Psychol Med* 2008;38(5):611-623.

Fava GA, Rafanelli C, Grandi S, et al. Six-year outcome for cognitive behavioral treatment of residual symptoms in major depression. *Am J Psychiatry* 1998;155:1443–1445.

Fava GA, Ruini C, Rafanelli C, et al. Six-year outcome of cognitive behavior therapy for prevention of recurrent depression. *Am J Psychiatry* 2004;161:1872–1876.

Fiorillo A, Malangone C, Del Vecchio VC, et al. The effect of family psychoeducational interventions on patients with depression. *Eur Psychiatry* 2011;26:7.

Foa EB, Dancu CV, Hembree EA, et al. A Comparison of exposure therapy, stress inoculation training, and their combination for reducing posttraumatic stress disorder in female assault victims. *J Consult Clin Psychol* 1999;67(2):194-200.

Foa EB, Hembree EA, Cahill SP, et al. Randomized trial of prolonged exposure for posttraumatic stress disorder with and without cognitive restructuring: outcome at academic and community clinics. *J Consult Clin Psychol* 2005;73(5):953-964.

Foa EB, Rothbaum BO, Riggs DS, et al. Treatment of posttraumatic stress disorder in rape victims : A comparison between cognitive-behavioral procedures and counseling. *J Consult Clin Psychol* 1991;59(5):715-723.

Friedman MJ, Marmar CR, Baker DG, et al. Randomized, double-blind comparison of sertraline and placebo for posttraumatic stress disorder in a Department of Veterans Affairs setting. *J Clin Psychiatry* 2007;68(5):711- 720.

Furmark T, Carlbring P, Hedman E, et al. Guided and unguided self-help for social anxiety disorder: randomized controlled trial. *Br J Psychiatry* 2009;195(5):440-447.

Garcia-Palacios A, Hoffman H, Carlin A, et al. Virtual reality in the treatment of spider phobia: a controlled study. *Behav Res Ther* 2002;40:983–993.

Giesen-Bloo J, van Dyck R, Spinhoven P, et al. Outpatient psychotherapy for borderline personality disorder randomized trial of schema-focused therapy vs. transference-focused psychotherapy. *Arch Gen Psychiatry* 2006;63(6):649–658.

Gilboa-Schechtman E, Foa EB, Shafran N, et al. Prolonged exposure vs dynamic therapy for adolescent PTSD: A pilot randomized controlled trial. *J Am Acad Child Adolesc Psychiatry* 2010;49(10):1034-1042.

Gray MJ, Schorr Y, Nash W, et al. Adaptive disclosure: An open trial of a novel exposure-based intervention for service members with combat-related psychological stress injuries. *Behav Ther* 2012;43:407–415.

Hellstrom K, Öst LG. One-session therapist directed exposure vs. 2 forms of manual directed self-exposure in the treatment of spider phobia. *Behav Res Ther* 1995;33:959–965.

Huband N, McMurrin M, Evans C, et al. Social problem-solving plus psychoeducation for adults with personality disorder : pragmatic randomised controlled trial. *Br J Psychiatry* 2007;190:307-313.

Joling KJ, van Hout HP, van't Veer-Tazelaar PJ, et al. How effective is bibliotherapy for very old adults with subthreshold depression? A randomized controlled trial. *Am J Geriatr Psychiatry* 2011;19(3):256-265.

Katon WJ, Von Korff M, Lin EH, et al. The Pathways Study: a randomized trial of collaborative care in patients with diabetes and depression. *Arch Gen Psychiatry* 2004;61:1042–1049.

Lee CW, Gavriel H, Drummond PD, et al. Treatment of PTSD: stress inoculation training with prolonged exposure compared to EMDR. *J Clin Psychol* 2002;58(9):1071–1089.

Li M, Chen K, Mo Z. Use of qigong therapy in the detoxification of heroin addicts. *Altern Ther Health Med* 2002;8:50–59.

Lobbestael J, Arntz A, Cima M, et al. Effects of induced anger in patients with antisocial personality disorder. *Psychol Med* 2009;39(4):557–568.

Lobbestael J, Arntz A. Emotional, cognitive and physiological correlates of abuse-related stress in borderline and antisocial personality disorder. *Behav Res Ther* 2010;48(2):116–124.

Lobbestael J, Arntz A, Sieswerda S. Schema modes and childhood abuse in borderline and antisocial patients. *J Behav Ther Exp Psychiatry* 2005;36(3):240–253.

Lobbestael J, Arntz A. The state dependency of cognitive schemas in antisocial patients. *Psychiatry Res* 2012;198:452-456.

Markowitz JC, Kocsis JH, Bleiberg KL, et al. A comparative trial of psychotherapy and pharmacotherapy for “pure” dysthymic patients. *J Affect Dis* 2005;89:167–175.

Markowitz JC, Kocsis JH, Christos P, et al. Pilot study of interpersonal psychotherapy for dysthymic patients with secondary alcohol abuse or dependence. *J Nerv Ment Dis* 2008;196:468–474.

Markowitz JC, Kocsis JH, Fishman B, et al. Treatment of depressive symptoms in human immunodeficiency virus-positive patients. *Arch Gen Psychiatry* 1998;55:452–457.

McDonagh A, Friedman M, McHugo G, et al. Randomized trial of cognitivebehavioral therapy for chronic posttraumatic stress disorder in adult female survivors of childhood sexual abuse. *J Consult Clin Psycho* 2005;73(3):515-524.

Monson CM, Schnurr PP, Resick PA, et al. Cognitive processing therapy for veterans with military-related posttraumatic stress disorder. *J Consult Clin Psychol* 2006;74(5):898–907.

Nacasch N, Foa EB, Huppert JD, et al. The efficacy of prolonged exposure therapy for combat and terror-related PTSD: A randomized control comparison with treatment as usual. *Am J Psychiatry* 2011;72(9):1174-1180.

Nadort M, Arntz A, Smit JH, et al. Implementation of outpatient schema therapy for borderline personality disorder with versus without crisis support of the therapist outside office hours: A randomized trial. *Behav Res Ther* 2009;47:961–973.

Nadort M, van Dyck R, Smit JA, et al. Three preparatory studies for promoting implementation of outpatient schema therapy for borderline personality disorder in general mental health care. *Behav Res Ther* 2009;47(11):938–945.

Neylan TC, Lenoci M, Maglione ML, et al. The effect of nefazodone on subjective and objective sleep quality in posttraumatic stress disorder. *J Clin Psychiatry* 2003;64(4):445–450.

Neylan TC, Lenoci M, Samuelson KW, et al. No improvement of post-traumatic stress disorder symptoms with guanfacine treatment. *Am J Psychiatry* 2006;163(12):2186–2188.

Nordin S, Carlbring P, Cuijpers P, et al. Expanding the limits of bibliotherapy for panic disorder: Randomized trial of self-help without support but with a clear deadline. *Behav Ther* 2010;41(3):267-276.

Öst LG, Salkovskis PM, Hellstrom K. One-session therapist-directed exposure vs. Self-exposure in the treatment of spider phobia. *Behav Ther* 1991;22:407-422.

Palic S, Elkit A. An explorative outcome study of CBT-based multidisciplinary treatment in a diverse group of refugees from a Danish treatment centre for rehabilitation of traumatized refugees. *Torture* 2009;19(3):248-270.

Perlis RH, Nierenberg AA, Alpert JE, et al. Effects of adding cognitive therapy to fluoxetine dose increase on risk of relapse and residual symptoms in continuation treatment of major depressive disorder. *J Clin Psychopharmacol* 2002;22:474-480.

Reiss N, Lieb K, Arntz A, et al. Responding to the treatment challenge of patients with severe BPD: results of three pilot studies of inpatient schema therapy. *Behav Cog Psychother* 2014;42:355-367.

Resick PA, Galovski TE, O'Brien Uhlmansiek M, et al. A randomized clinical trial to dismantle components of cognitive processing therapy for posttraumatic stress disorder in female victims of interpersonal violence. *J Consult Clin Psychol* 2008;76(2):243-258.

Resick PA, Nishith P, Weaver TL, et al. A comparison of cognitive-processing therapy with prolonged exposure and a waiting condition for the treatment of chronic posttraumatic stress disorder in female rape victims. *J Consult Clin Psychol* 2002;70(4):867-879.

Schindler A, Hiller W. Therapieeffekte und Responderaten bei unipolar depressiven Patienten einer verhaltenstherapeutischen Hochschulambulanz [Therapy effects and response rates of cognitive-behavioral treatment for unipolar depressive patients in an outpatient clinic] *Zeitschrift für Klinische Psychologie und Psychotherapie: Forschung und Praxis* 2010;39:107-115.

Schnurr PP, Friedman MJ, Engel CC, et al. Cognitive behavioral therapy for posttraumatic stress disorder in women: a randomized controlled trial. *JAMA* 2007;297(8):820-830.

Schnurr PP, Friedman MJ, Foy DW, et al. Randomized trial of traumafocused group therapy for posttraumatic stress disorder: results from a department of veterans affairs cooperative study. *Arch Gen Psychiatry* 2003;60(5):481-489.

Schnurr PP, Friedman MJ, Lavori PW, et al. Design of Department of Veterans Affairs Cooperative Study No. 420: Group treatment of posttraumatic stress disorder. *Control Clin Trials* 2001;22(1):74-88.

Shelton RC, Haman KL, Rapaport MH, et al. A randomized, double-blind, active-control study of sertraline versus venlafaxine XR in major depressive disorder. *J Clin Psychiatry* 2006;67:1674-1681.

Sieswerda S, Arntz A, Kindt M. Successful psychotherapy reduces hypervigilance in borderline personality disorder. *Behav Cog Psychotherapy* 2007;35(4):387-402.

Sieswerda S, Arntz A, Mertens I, et al. Hypervigilance in patients with borderline personality disorder: Specificity, automaticity, and predictors. *Behav Res Ther* 2007;45(5):1011-1024.

Spinhoven P, Giesen-Bloo J, van Dyck R, et al. Can assessors and therapists predict the outcome of long-term psychotherapy in borderline personality disorder? *J Clin Psychol* 2008;64(6):667-686.

Spinhoven P, Giesen-Bloo J, van Dyck R, et al. The therapeutic alliance in schema-focused therapy and transference-focused psychotherapy for borderline personality disorder. *J Consult Clin Psychol* 2007;75(1):104-115.

Swanson LM, Favorite TK, Horin E, et al. A combined group treatment for nightmares and insomnia in combat veterans: A pilot study. *J Trauma Stress* 2009;22(6):639-642.

Taylor DT, Meader N, Bird V, et al. Pharmacology subgroup of the National Institute for Health and Clinical Excellence Guideline Development Group for Depression in Chronic Physical Health Problems. Pharmacological interventions for people with depression and chronic physical health problems: Systematic review and meta-analyses of safety and efficacy. *Br J Psychiatry* 2011;198:179-188.

Van Asselt ADI, Dirksen CD, Arntz A, et al. Outpatient psychotherapy for borderline personality disorder: Cost effectiveness of schema-focused therapy versus transference focused psychotherapy. *Br J Psychiatry* 2008;192:450-457.



Van der Heiden C, Muris P, van der Molen HT. Randomized controlled trial on the effectiveness of metacognitive therapy and intolerance-of-uncertainty therapy for generalized anxiety disorder. *Behav Res Ther* 2012;50(2):100-109.

Van Emmerik AAP, Kamphuis JH, Ernmelkamp PMG. Treating acute stress disorder and posttraumatic stress disorder with cognitive behavioral therapy or structured writing therapy: a randomized controlled trial. *Psychother Psychosom* 2008;77:93-100.

Vilhauer JS, Young S, Kealoha C, et al. Treating major depression by creating positive expectations for the future: a pilot study for the effectiveness of future directed therapy (FDT) on symptom severity and quality of life. *CNS Neurosci Ther* 2012;18(2):102-109.

Watts BV, Landon B, Groft A, et al. A sham controlled study of repetitive transcranial magnetic stimulation for posttraumatic stress disorder. *Brain Stimul* 2012;5(1):38-43.

Willemse GRWM, Smit F, Cuijpers P, et al. Minimal-contact psychotherapy for sub-threshold depression in primary care. *Br J Psychiatry* 2004;185: 416-421.

Williams Jr JW, Katon W, Lin EH, et al. The effectiveness of depression care management on diabetes-related outcomes in older patients. *Ann Intern Med* 2004;140:1015-1024.
